# Supplementary material for: Enhanced in vivo tumour imaging by EDTA-bis-GNGR functionalized core shell CdSe:ZnS quantum dot: synergistic effect of active passive targeting
Source: Royal Society of Chemistry journal article supplement (doi:10.1039/c5ra22989h), 2016-01-01
Supplement: c5ra22989h1.pdf [file c5ra22989h1.pdf]

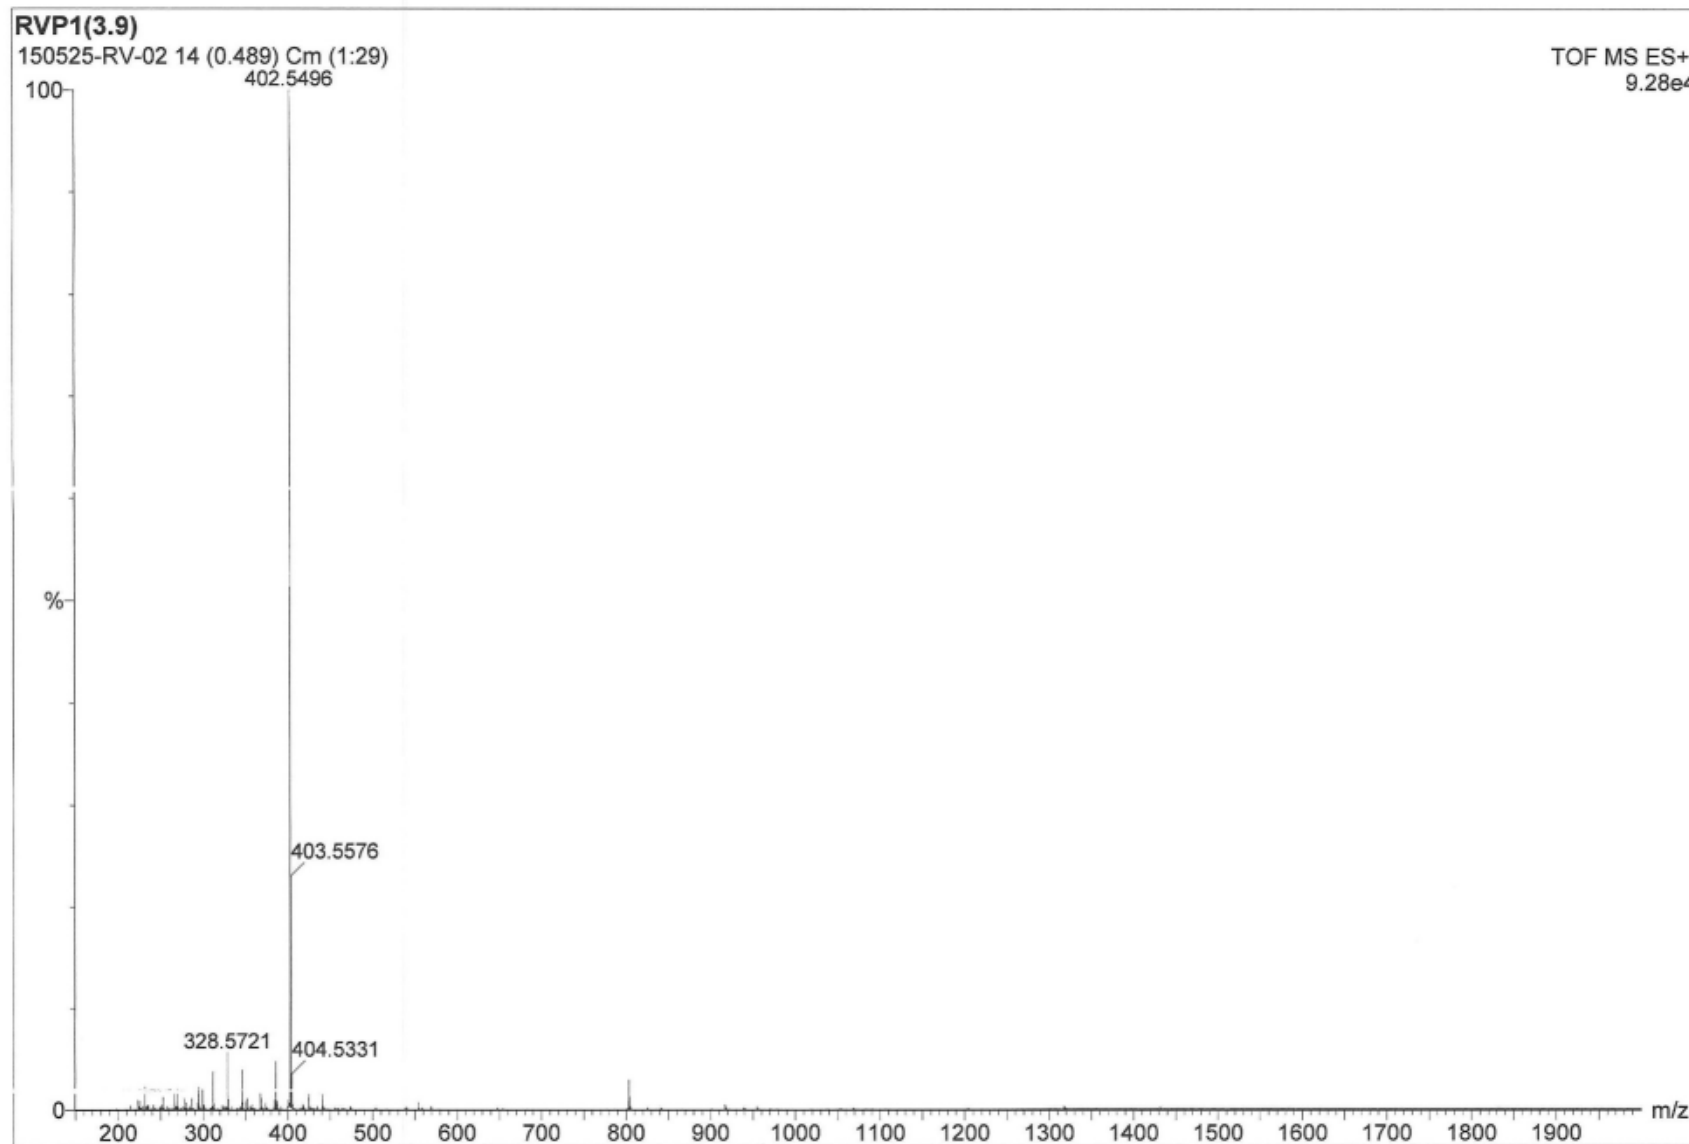

HRMS of GNDR peptide

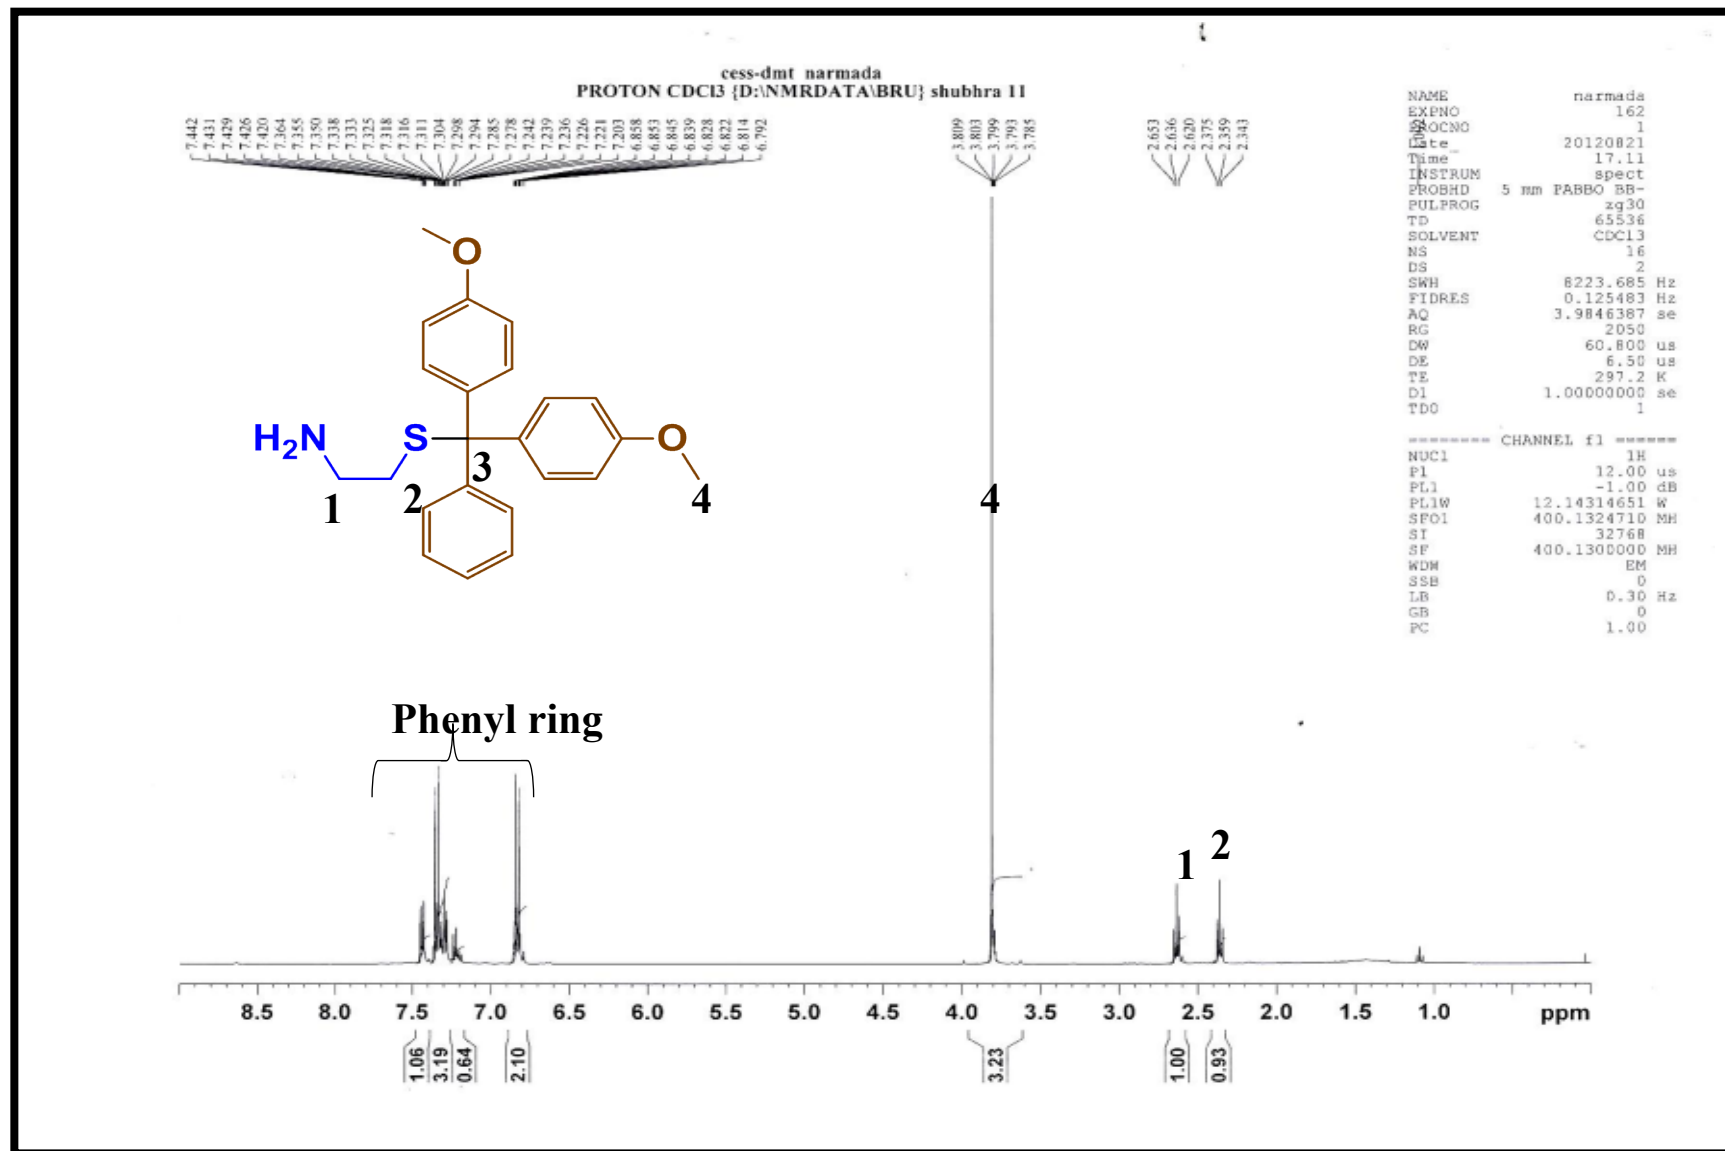

<sup>1</sup>H-NMR spectrum of Cysteamine-DMT

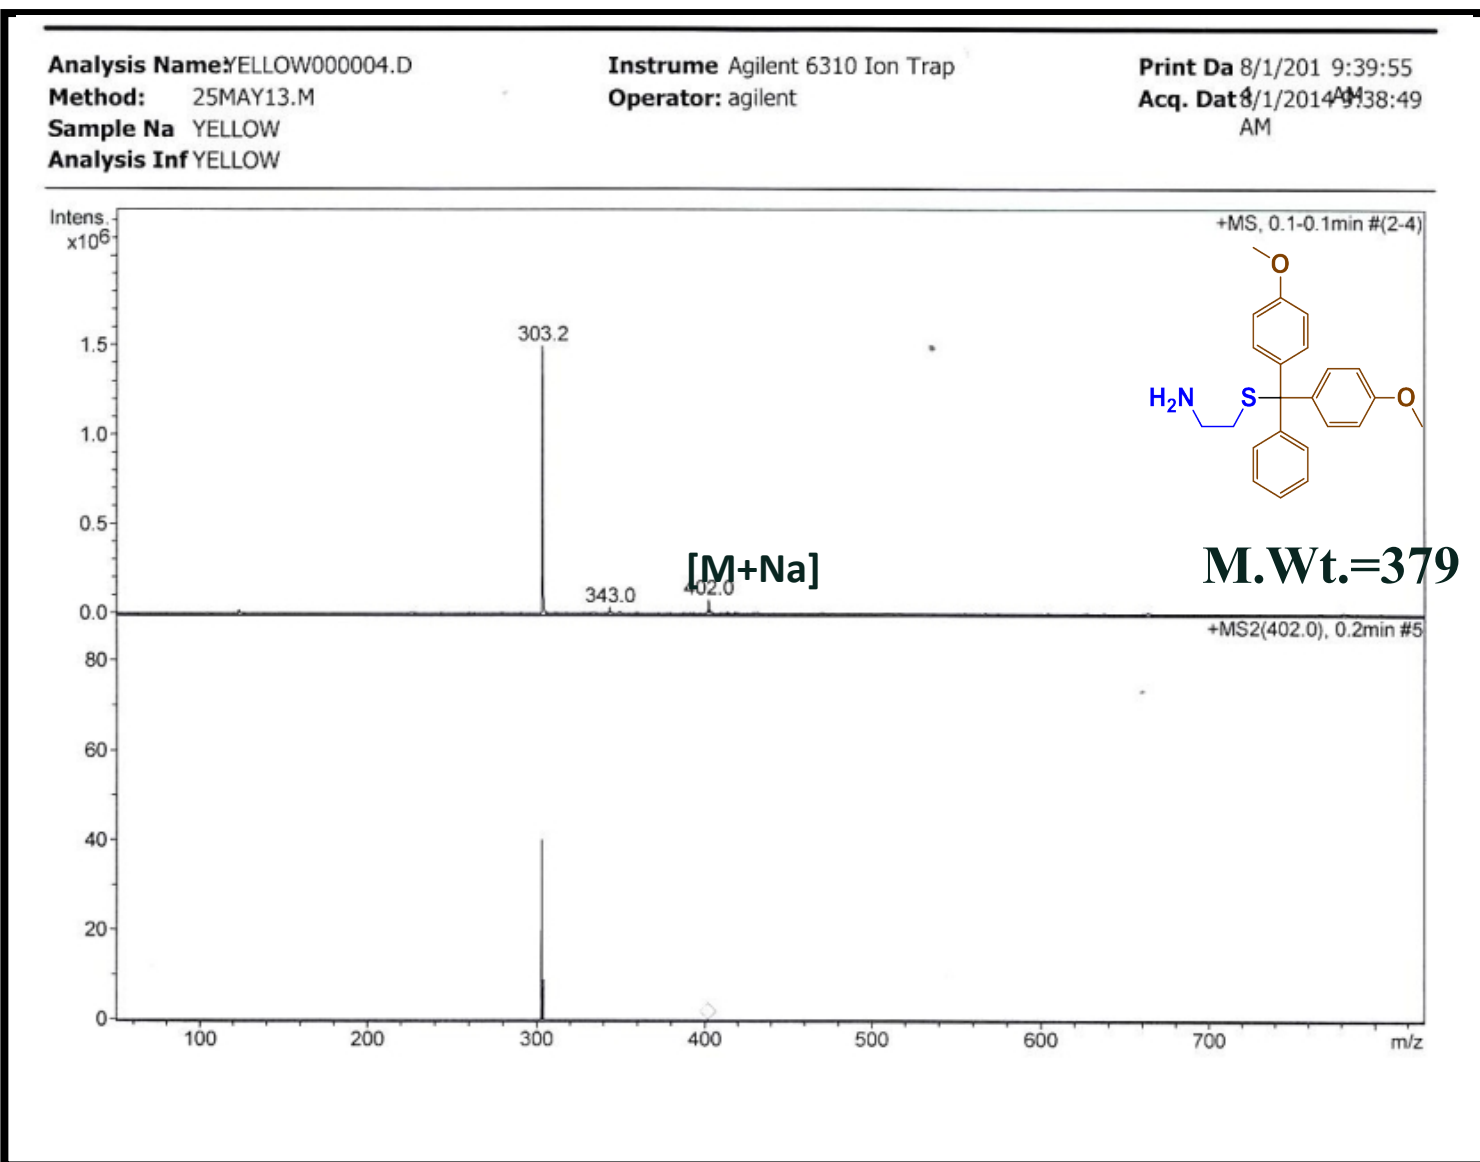

Mass spectrum of Cysteamine-DMT

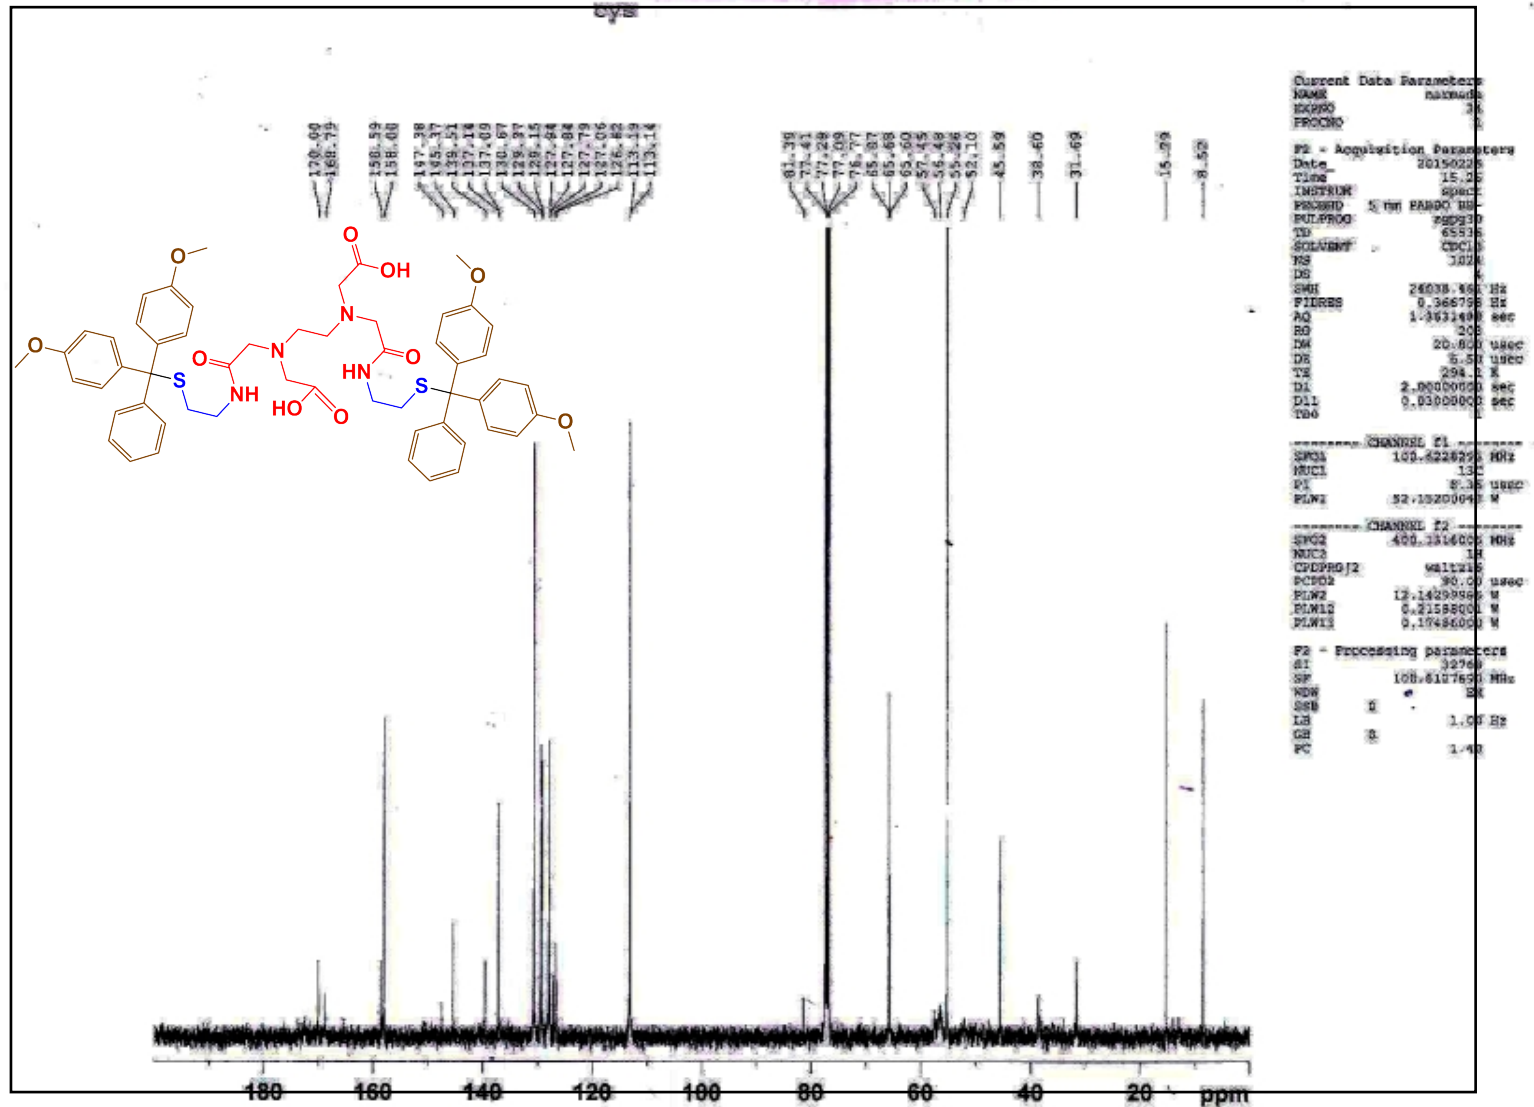
 $^{13}\text{C}$  NMR of EDTA-Bis-Cysteamine-DMT

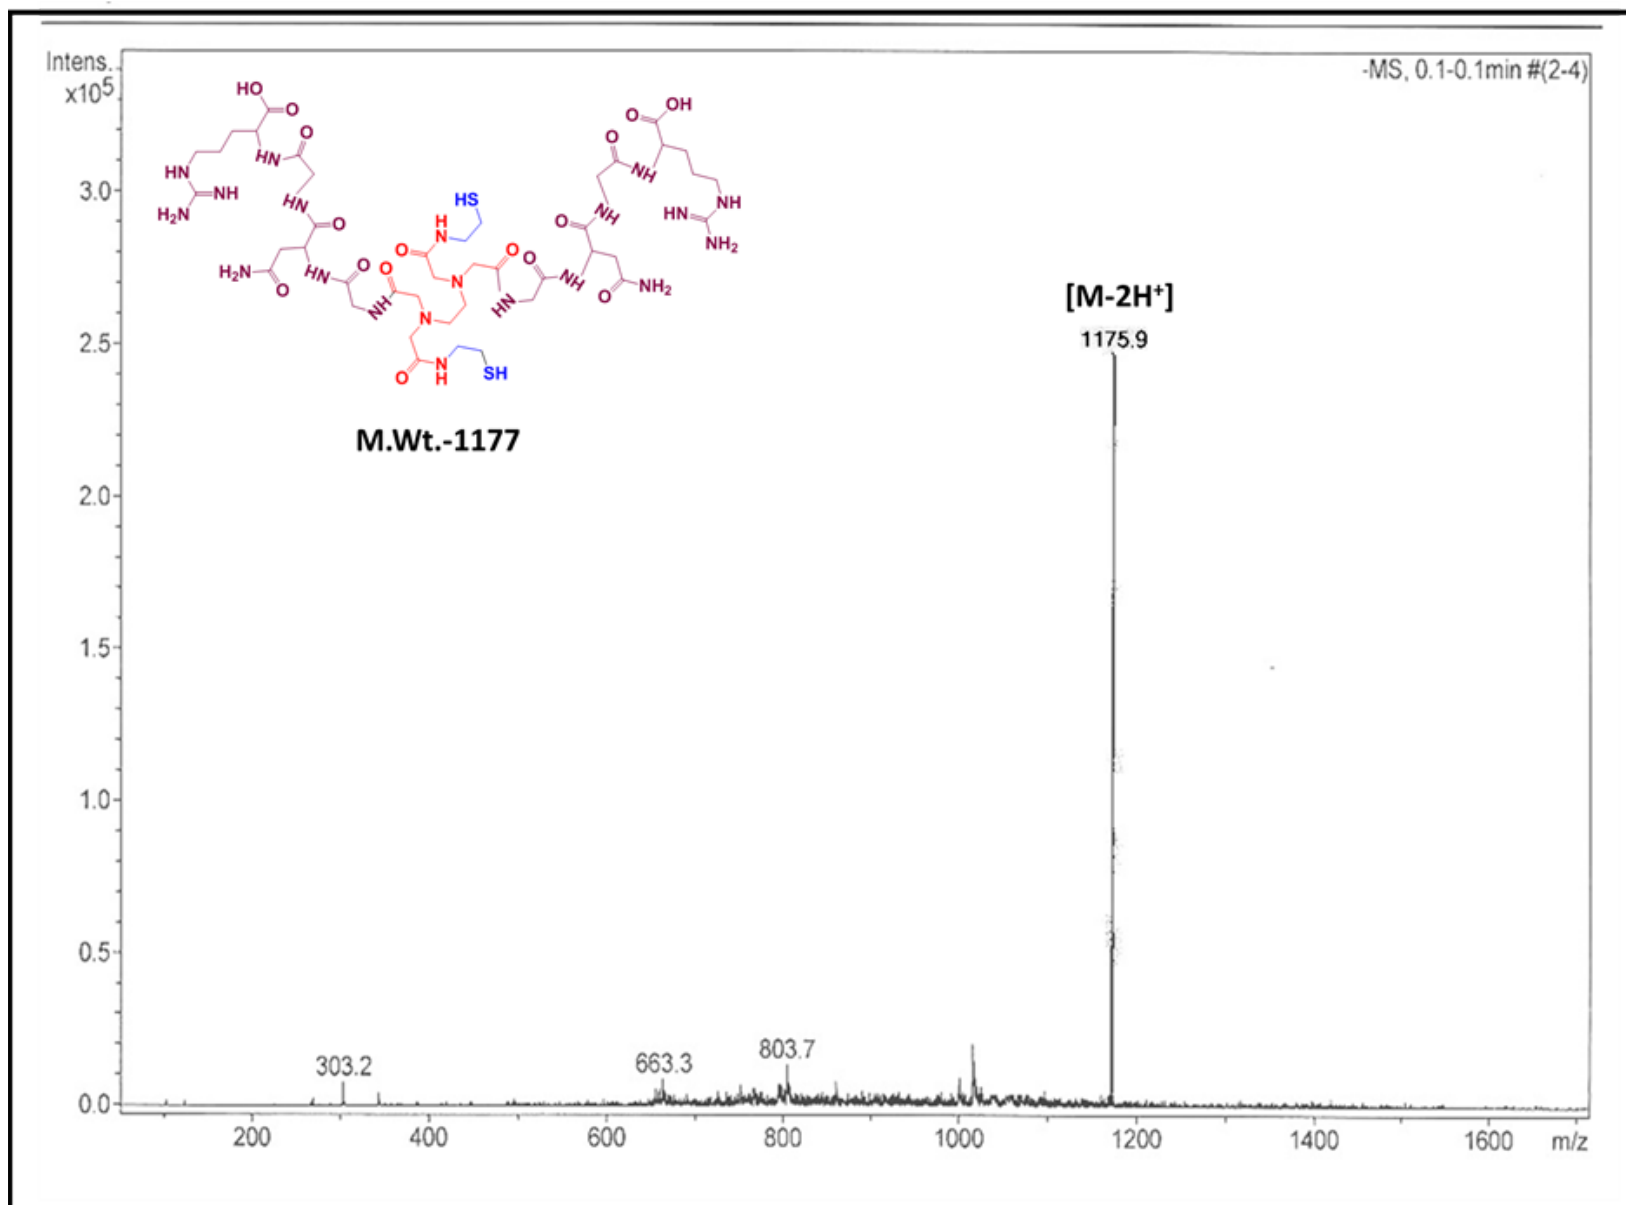

Mass Spectrum of EDTA-Bis-GNGR ligand
